# Supplementary material
Source: PubMed Central journal article supplement (PMC9521383)
Supplement: tp-106-2063-s001.pdf [file tp-106-2063-s001.pdf]

**Table S1. Penalized logistic regression of risk factors for 60-day mortality in kidney transplant recipients with COVID-19 (N=1451) – Individual drugs**

|                                               | Odds ratio | 95% CI      | Variable Inclusion Probability |
|-----------------------------------------------|------------|-------------|--------------------------------|
| Age, years                                    | 2.472      | [1.67;3.58] | <b>1.000</b>                   |
| Gender                                        |            |             |                                |
| Female                                        | 1.210      | [0.97;1.93] | <b>0.881</b>                   |
| Male                                          | 0.945      | [0.76;1.00] | 0.679                          |
| Blood group                                   |            |             |                                |
| A                                             | 1.020      | [0.72;1.32] | 0.356                          |
| B                                             | 1.335      | [0.87;2.29] | 0.79                           |
| AB                                            | 0.829      | [0.33;1.63] | 0.741                          |
| O                                             | 0.877      | [0.61;1.09] | 0.645                          |
| Comorbidities                                 |            |             |                                |
| Hypertension                                  | 1.000      | [0.81;1.31] | 0.508                          |
| Diabetes mellitus                             | 1.019      | [1.00;1.37] | <b>0.843</b>                   |
| Cardiovascular disease                        | 1.003      | [0.99;1.31] | 0.792                          |
| Cancer                                        | 1.023      | [1.00;1.58] | <b>0.940</b>                   |
| Smoking                                       | 1.000      | [0.82;1.15] | 0.589                          |
| Respiratory disease                           | 1.000      | [0.90;1.28] | 0.696                          |
| BMI, kg/m <sup>2</sup>                        | 1.165      | [1.01;1.46] | <b>0.913</b>                   |
| ≥2 transplantations                           | 1.000      | [0.82;1.22] | 0.627                          |
| Living donor                                  | 0.963      | [0.67;1.00] | 0.656                          |
| Time from transplantation to COVID-19, months | 1.001      | [0.84;1.17] | 0.708                          |
| Baseline serum creatinine, μmol/L             | 1.404      | [1.16;1.77] | <b>1.000</b>                   |
| Induction therapy                             |            |             |                                |
| Anti-CD25                                     | 1.082      | [0.86;1.47] | 0.480                          |
| Thymoglobulins                                | 1.085      | [0.87;1.52] | 0.446                          |
| No induction                                  | 0.552      | [0.08;1.02] | <b>0.821</b>                   |
| Maintenance immunosuppression                 |            |             |                                |
| Calcineurin inhibitors <sup>b</sup>           | 0.973      | [0.74;1.07] | 0.620                          |
| Antimetabolites <sup>c</sup>                  | 1.000      | [0.80;1.26] | 0.601                          |
| Corticosteroids                               | 1.008      | [1.00;1.44] | <b>0.836</b>                   |
| mTOR inhibitors                               | 1.002      | [0.91;1.40] | 0.670                          |
| Belatacept                                    | 0.998      | [0.60;1.17] | 0.575                          |

Odds ratios (OR), 95% Confidence intervals (CI) and multiple corrected (false discovery rate) adjusted P-values from the logistic regression are shown.

<sup>a</sup>For each 1 μmol/L increase in serum creatinine

<sup>b</sup>Tacrolimus or Ciclosporine.

<sup>c</sup>Mycophenolate Mofetil, Mycophenolate Acid or Azathioprine.

BMI, Body Mass Index; CNI: Calcineurine Inhibitor, mTOR, mammalian Target Of Rapamycin.

**Table S2. Penalized logistic regression of risk factors for 60-day mortality in kidney transplant recipients with COVID-19 (N=1451) – Immunosuppressive regimens**

|                                                   | Odds ratio | 95% CI       | Variable Inclusion Probability |
|---------------------------------------------------|------------|--------------|--------------------------------|
| Age, years                                        | 2.620      | [1.89; 3.56] | <b>1.000</b>                   |
| Gender                                            |            |              |                                |
| Female                                            | 1.243      | [1.00; 1.94] | <b>0.881</b>                   |
| Male                                              | 0.970      | [0.76; 1.00] | 0.677                          |
| Blood group                                       |            |              |                                |
| A                                                 | 0.960      | [0.71; 1.20] | 0.346                          |
| B                                                 | 1.418      | [0.98; 2.40] | <b>0.834</b>                   |
| AB                                                | 0.970      | [0.36; 2.01] | 0.719                          |
| O                                                 | 0.884      | [0.63; 1.07] | 0.580                          |
| Comorbidities                                     |            |              |                                |
| Hypertension                                      | 1.000      | [0.93; 1.38] | 0.585                          |
| Diabetes mellitus                                 | 1.003      | [1.00; 1.48] | <b>0.898</b>                   |
| Cardiovascular disease                            | 1.000      | [0.96; 1.24] | 0.718                          |
| Cancer                                            | 1.004      | [1.00; 1.61] | <b>0.943</b>                   |
| Smoking                                           | 1.000      | [0.87; 1.21] | 0.616                          |
| Respiratory disease                               | 1.000      | [0.86; 1.24] | 0.647                          |
| BMI, kg/m <sup>2</sup>                            | 1.203      | [1.02; 1.47] | <b>0.965</b>                   |
| ≥2 transplantations                               | 1.000      | [0.85; 1.23] | 0.644                          |
| Living donor                                      | 0.986      | [0.64; 1.03] | 0.647                          |
| Time from transplantation to COVID-19, months     | 0.991      | [0.83; 1.17] | 0.720                          |
| Baseline serum creatinine, μmol/L                 | 1.492      | [1.24; 1.86] | <b>1.000</b>                   |
| Induction therapy                                 |            |              |                                |
| Anti-CD25                                         | 1.107      | [0.91; 1.45] | 0.441                          |
| Thymoglobulins                                    | 1.092      | [0.89; 1.47] | 0.417                          |
| No induction                                      | 0.457      | [0.05; 0.97] | <b>0.871</b>                   |
| Immunosuppressive regimens                        |            |              |                                |
| CNI + antimetabolite + corticosteroids            | 0.901      | [0.59; 1.24] | 0.718                          |
| CNI + mTOR inhibitor + corticosteroids            | 0.950      | [0.32; 2.19] | 0.754                          |
| Antimetabolite + mTOR inhibitor + corticosteroids | 1.619      | [0.71; 5.21] | <b>0.842</b>                   |
| CNI + antimetabolite                              | 0.625      | [0.28; 0.92] | <b>0.994</b>                   |
| CNI + corticosteroids                             | 1.046      | [0.56; 1.83] | 0.739                          |

Odds ratios (OR), 95% Confidence intervals (CI) and multiple corrected (false discovery rate) adjusted P-values from the logistic regression are shown.

<sup>a</sup>For each 1 μmol/L increase in serum creatinine

<sup>b</sup>Tacrolimus or Ciclosporine.

<sup>c</sup>Mycophenolate Mofetil, Mycophenolate Acid or Azathioprine.

BMI, Body Mass Index; CNI: Calcineurine Inhibitor, mTOR, mammalian Target Of Rapamycin.
